# Supplementary material
Source: publisher site journal article supplement (https://www.dovepress.com/article/585908)
Supplement: Supplementary file 1 [file 585908%20Supplementary%20Material.docx]

Table S1. Target sequences of small interfering RNAs (siRNAs) for PSAP knockdown.

| Target Gene/ Application | siRNA Name | Primer Sequences |
| --- | --- | --- |
| Rat PSAP | si-PSAP-1 | Sense: GGGAACUUGCUGAAAGAUAAUTT  Antisense: AUUAUCUUUCAGCAAGUUCCCTT |
|  | si-PSAP-2 | Sense: GAACUAUGUUGACCAGUAUUCTT  Antisense: GAAUACUGGUCAACAUAGUUCTT |
|  | si-PSAP-3 | Sense: CCUUCCUUUGUGUGCUCGAAATT  Antisense: UUUCGAGCACACAAAGGAAGGTT |
| Negative Control | si-NC | Sense: UUCUCCGAACGUGUCACGU TT  Antisense: ACGUGACACGUUCGGAGAA TT |
